# Supplementary material
Source: HighWire-hosted journal article supplement (https://bmjopen.bmj.com/content/9/3/e022478)
Supplement: inline-supplementary-material-1 [file inline-supplementary-material-1.pdf]

## **Supplementary Appendix**

### **Ethics committees involved in the respective countries**

#### Austria

Ethikkommission der Medizinischen Universität Wien  
Borschkegasse 8b/E06, Vienna

#### Germany

Geschäftsstelle der Ethik-Kommission, Ärztekammer Berlin  
Friedrichstrasse 16, Berlin

#### Switzerland

EKOS – Ethikkommission Ostschweiz, St. Gallen  
Ethikkommission Nordwest- und Zentralschweiz, Basel  
Kantonale Ethikkommission Zürich, Zürich  
Comitato etico cantonale, Bellinzona

#### Spain

CEIC Hospital Clínico San Carlos; Doctor Martín Lagos, s/n. Madrid 28040  
Madrid  
EC Valencia

#### France

Ministere De L'enseignement superieur Et de la recherché  
Paris, France

#### Italy

EC Chieti, Ospedali Riuniti SS Annunziata-Chieti  
EC Spezia  
EC Salerno  
EC Taranto  
EC Treviso  
ASREM Campobasso Via Ugo Peirella

#### United Kingdom

Health Research Authority, Cornwall & Plymouth, Bristol REC Centre, Level 3,  
Block B Whitefriars, Lewins Mead Bristol BS1 2NT

**Supplementary table 1: C-statistics for validated risk scores and the clusters of risk factors for thromboembolic and bleeding events (PREFER in AF derivation cohort)**

| Score                                  | AUC    | 95% CI          | p-value vs.<br>cluster -<br>stroke   | p-value vs.<br>HAS-BLED |
|----------------------------------------|--------|-----------------|--------------------------------------|-------------------------|
| <b>Stroke or SEE</b>                   |        |                 |                                      |                         |
| Cluster - stroke*                      | 0.7402 | 0.6868 - 0.7935 | -                                    | <0.01                   |
| HAS-BLED                               | 0.6871 | 0.6320 - 0.7422 | <0.01                                | -                       |
| Cluster – bleeding                     | 0.6639 | 0.6070 - 0.7209 | <0.01                                | 0.581                   |
| CHA <sub>2</sub> DS <sub>2</sub> -VASc | 0.6464 | 0.5932 - 0.6995 | <0.01                                | 0.408                   |
|                                        |        |                 |                                      |                         |
|                                        |        |                 | p-value vs.<br>cluster -<br>bleeding | p-value vs.<br>HAS-BLED |
| <b>Major Bleeding</b>                  |        |                 |                                      |                         |
| Cluster – bleeding*                    | 0.6982 | 0.6529 - 0.7469 | -                                    | <0.01                   |
| HAS-BLED                               | 0.6314 | 0.5846 - 0.6782 | <0.01                                | -                       |
| Cluster – stroke                       | 0.5956 | 0.5469 - 0.6443 | <0.01                                | 0.178                   |
| CHA <sub>2</sub> DS <sub>2</sub> -VASc | 0.5855 | 0.5403 - 0.6307 | <0.01                                | 0.018                   |

Legend: AUC: area under the curve, CI: confidence interval

**Supplementary table 2: C-statistics for ischemic stroke and systemic embolic events without TIA (derivation cohort)**

|                                        | <b>AUC</b> | <b>p-value*</b> | <b>95% CI</b> |        |
|----------------------------------------|------------|-----------------|---------------|--------|
| New Cluster – stroke                   | 0.6802     | <0.0001         | 0.6074        | 0.7536 |
| CHA <sub>2</sub> DS <sub>2</sub> -VASc | 0.6562     | <0.0001         | 0.5888        | 0.7235 |
| HAS-BLED                               | 0.6337     | <0.0001         | 0.5549        | 0.7125 |
| Cluster – bleeding                     | 0.6259     | <0.0001         | 0.5400        | 0.7117 |

Legend: AUC: area under the curve, CI: confidence interval

\* testing of difference from AUC=0.5000

**Supplementary table 3: C-statistics for TIA only (derivation cohort)**

|                                        | <b>AUC</b> | <b>p-value*</b> | <b>95% CI</b> |        |
|----------------------------------------|------------|-----------------|---------------|--------|
| New Cluster – stroke                   | 0.7850     | <0.0001         | 0.7197        | 0.8504 |
| HAS-BLED                               | 0.7473     | <0.0001         | 0.6775        | 0.8172 |
| Cluster – bleeding                     | 0.7105     | <0.0001         | 0.6407        | 0.7802 |
| CHA <sub>2</sub> DS <sub>2</sub> -VASc | 0.6340     | <0.0001         | 0.5570        | 0.7109 |

Legend: AUC: area under the curve, CI: confidence interval

\* testing of difference from AUC=0.5000

**Supplementary table 4: Validation of the identified clusters of risk factors for thromboembolic and bleeding events in the PREFER in AF Prolongation Study (labile INR disregarded)**

| <b>Score</b>                           | <b>AUC</b> | <b>95% CI</b>   | <b>p-value vs. cluster - stroke</b> |
|----------------------------------------|------------|-----------------|-------------------------------------|
| <b>Stroke or SEE</b>                   |            |                 |                                     |
| Cluster - stroke                       | 0.6197     | 0.5219 - 0.7175 | -                                   |
| CHA <sub>2</sub> DS <sub>2</sub> -VASc | 0.5600     | 0.4777 - 0.6423 | 0.3029                              |
| Cluster – bleeding                     | 0.5399     | 0.4345 - 0.6453 | 0.1023                              |
| HAS-BLED                               | 0.5371     | 0.4487 - 0.6255 | 0.2433                              |
| <b>p-value vs. cluster – bleeding</b>  |            |                 |                                     |
| <b>Major Bleeding</b>                  |            |                 |                                     |
| Cluster – bleeding                     | 0.6334     | 0.5548 - 0.7119 | -                                   |
| HAS-BLED                               | 0.6252     | 0.5611 - 0.6892 | 0.8764                              |
| CHA <sub>2</sub> DS <sub>2</sub> -VASc | 0.5607     | 0.4910 - 0.6305 | 0.2898                              |
| Cluster - stroke                       | 0.5567     | 0.4712 - 0.6423 | 0.0092                              |

Legend: AUC: area under the curve, CI: confidence interval, SEE: systemic embolic event

**Supplementary table 5: Validation of the identified clusters of risk factors for thromboembolic and bleeding events in the PREFER in AF Prolongation Study** (labile INR accounted for as reported in 6.9% of patients)

| Score                                  | AUC    | 95% CI          | p-value vs. cluster -<br>stroke   |
|----------------------------------------|--------|-----------------|-----------------------------------|
| <b>Stroke or SEE</b>                   |        |                 |                                   |
| Cluster - stroke                       | 0.6095 | 0.5153 - 0.7037 | -                                 |
| CHA <sub>2</sub> DS <sub>2</sub> -VASc | 0.5600 | 0.4777 - 0.6423 | 0.3307                            |
| Cluster – bleeding                     | 0.5390 | 0.4342 - 0.6438 | 0.1527                            |
| HAS-BLED                               | 0.5371 | 0.4487 - 0.6255 | 0.2782                            |
|                                        |        |                 | p-value vs. cluster –<br>bleeding |
| <b>Major Bleeding</b>                  |        |                 |                                   |
| Cluster – bleeding                     | 0.6476 | 0.5668 - 0.7283 | -                                 |
| HAS-BLED                               | 0.6252 | 0.5611 - 0.6892 | 0.9066                            |
| Cluster - stroke                       | 0.5758 | 0.4850 - 0.6665 | 0.0132                            |
| CHA <sub>2</sub> DS <sub>2</sub> -VASc | 0.5607 | 0.4910 - 0.6305 | 0.1423                            |

Legend: AUC: area under the curve, CI: confidence interval, SEE: systemic embolic event
